# Supplementary material for: Determination of Urinary Neopterin/Creatinine Ratio to Distinguish Active Tuberculosis from Latent Mycobacterium tuberculosis Infection
Source: PubMed Central journal article supplement (PMC4940561; doi:10.1155/2016/5643853), 2016-06-28

## Appendix

In tuberculosis mean neopterin/creatinine ratio= 429 micromol/mol standard deviation (SD)= 296, in latent M. tuberculosis infection: mean=162.1, SD=94.6, in controls: mean=134, SD=54.6.

In tuberculosis before treatment: mean (SD)= 503.9 (371.4) after treatment: mean= 233.9 (112.9), in latent M. tuberculosis infection before treatment: mean (SD) =213.3 (86.7) after treatment: mean = 217.2 (94.7).

Supplementary table 1. Raw data for urinary neopterin and creatinine levels and neopterin/creatinine ratios

|                                             | Urinary neopterin level (nmol/l) | Urinary creatinine level (mmol/l) | Urinary neopterin/ creatinine ratio (nmol/mmol) |
|---------------------------------------------|----------------------------------|-----------------------------------|-------------------------------------------------|
| Controls                                    | 1162                             | 28.8                              | 40.3                                            |
|                                             | 384                              | 5.5                               | 69.8                                            |
|                                             | 1061                             | 8.1                               | 130.9                                           |
|                                             | 1162                             | 11.5                              | 101.0                                           |
|                                             | 949                              | 6.5                               | 146.0                                           |
|                                             | 1162                             | 6.6                               | 176.1                                           |
|                                             | 2525                             | 13.2                              | 191.3                                           |
|                                             | 474                              | 3.1                               | 153.1                                           |
|                                             | 2020                             | 10.1                              | 200.0                                           |
| Latent Mycobacterium tuberculosis infection | 1121                             | 9.1                               | 123.0                                           |
|                                             | 2222                             | 25.1                              | 88.5                                            |
|                                             | 2020                             | 14.4                              | 140.0                                           |
|                                             | 616                              | 22.0                              | 28.0                                            |
|                                             | 1060                             | 10.7                              | 99.1                                            |
|                                             | 313                              | 1.8                               | 173.9                                           |
|                                             | 515                              | 2.9                               | 177.6                                           |
|                                             | 1970                             | 16.1                              | 122.4                                           |
|                                             | 1212                             | 5.8                               | 208.9                                           |
|                                             | 990                              | 8.8                               | 112.5                                           |
|                                             | 495                              | 1.5                               | 330.0                                           |
|                                             | 1818                             | 18.9                              | 96.1                                            |
|                                             | 1263                             | 8.4                               | 144.2                                           |
|                                             | 1869                             | 20.0                              | 93.4                                            |
|                                             | 1667                             | 21.3                              | 78.2                                            |
|                                             | 657                              | 11.8                              | 55.7                                            |
|                                             | 606                              | 13.5                              | 44.9                                            |
|                                             | 707                              | 18.8                              | 37.6                                            |
|                                             | 333                              | 1.9                               | 175.2                                           |
|                                             | 929                              | 8.7                               | 106.8                                           |

|                     |      |      |        |
|---------------------|------|------|--------|
|                     | 1616 | 22.0 | 73.4   |
|                     | 1030 | 4.1  | 251.2  |
|                     | 2525 | 10.6 | 238.2  |
|                     | 1081 | 3.6  | 300.3  |
|                     | 5252 | 16.3 | 322.2  |
|                     | 5151 | 28.0 | 184.0  |
|                     | 2727 | 7.1  | 384.1  |
|                     | 3030 | 9.6  | 315.6  |
|                     | 1818 | 8.2  | 221.7  |
|                     | 384  | 4.9  | 78.4   |
|                     | 3737 | 22.2 | 168.3  |
|                     | 1162 | 5.4  | 215.0  |
| Active tuberculosis | 1212 | 9.4  | 129.0  |
|                     | 5757 | 8.4  | 685.3  |
|                     | 6262 | 20.0 | 313.1  |
|                     | 1212 | 8.4  | 368.0  |
|                     | 2929 | 16.3 | 179.6  |
|                     | 889  | 5.1  | 174.3  |
|                     | 8686 | 8.1  | 1072.3 |
|                     | 3737 | 4.4  | 849.3  |
|                     | 3232 | 8.5  | 380.2  |
|                     | 3030 | 18.3 | 165.6  |
|                     | 6464 | 16.7 | 387.1  |
|                     | 2424 | 5.4  | 448.9  |

Supplementary Figure 1: Dot plot of urinary neopterin/creatinine ratios in patients with active tuberculosis: *Mycobacterium tuberculosis* infection and controls without *Mycobacterium tuberculosis* infection.

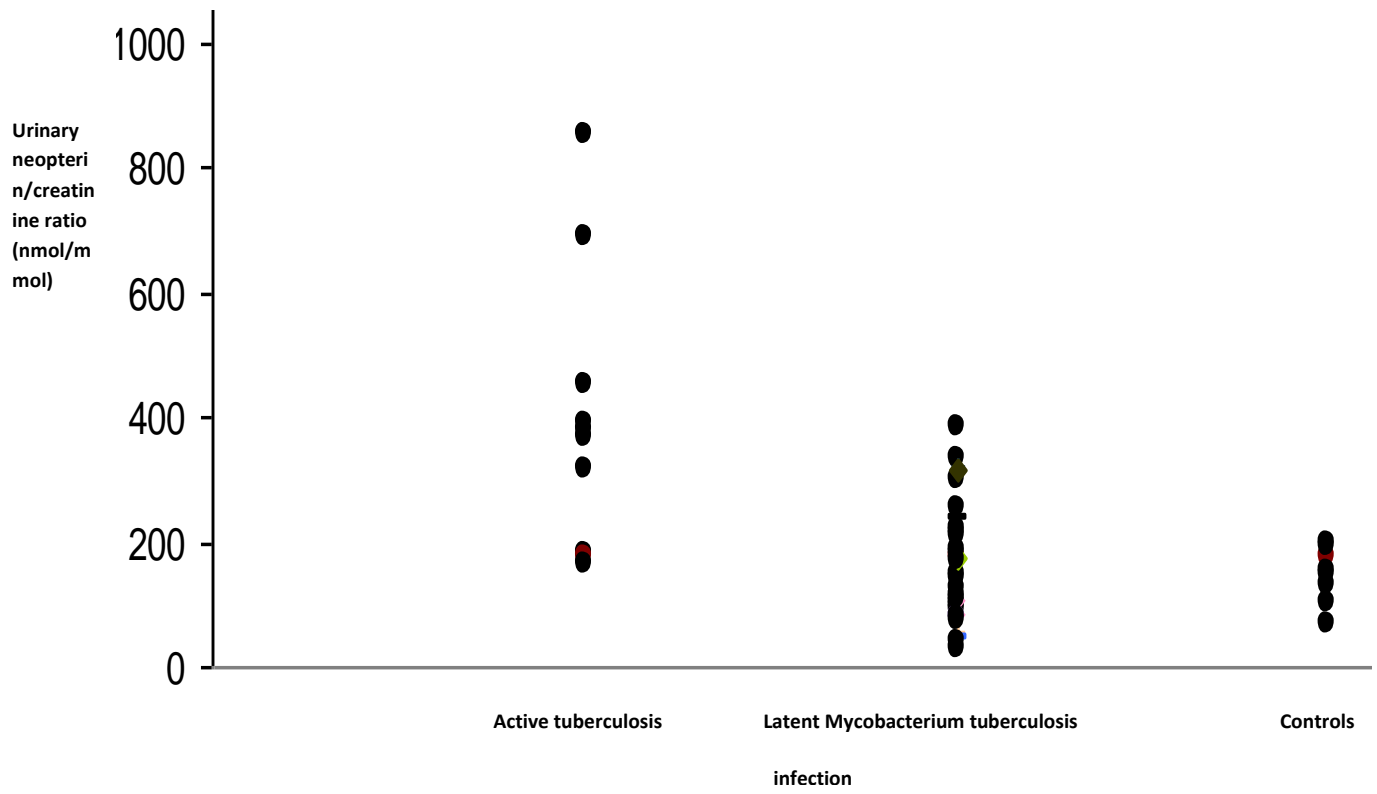

Supplement: 5643853.f1.pdf [file 5643853.f1.pdf]
